# Supplementary material for: A Coumarin–Imidazothiadiazole Derivative, SP11 Abrogates Tumor Growth by Targeting HSP90 and Its Client Proteins
Source: MDPI journal article supplement (doi:10.3390/molecules28135226), 2023-07-05

# A Coumarin–Imidazothiadiazole Derivative, SP11 Abrogates Tumor Growth by Targeting HSP90 and Its Client Proteins

Snehal Nirgude <sup>1,2,†</sup>, Shahana M. V. <sup>1,†</sup>, Febina Ravindran <sup>1</sup>, Sujeet Kumar <sup>3,†</sup>, Shivangi Sharma <sup>1,4,†</sup>, Raghunandan Mahadeva <sup>1</sup>, Anisha Mhatre <sup>1</sup>, Subhas S. Karki <sup>3,\*</sup> and Bibha Choudhary <sup>1,\*</sup>

<sup>1</sup> Institute of Bioinformatics and Applied Biotechnology, Electronic City Phase 1, Bangalore 560100, Karnataka, India

<sup>2</sup> Division of Human Genetics, Children's Hospital of Philadelphia, Philadelphia, PA 19104, USA

<sup>3</sup> Dr. Prabhakar B. Kore Basic Science Research Laboratory Center (Off-Campus), Department of Pharmaceutical Chemistry, KLE College of Pharmacy, Rajajinagar, (A Constituent Unit of KLE Academy of Higher Education; Research, Belagavi), Bangalore 560010, Karnataka, India

<sup>4</sup> Department of Biochemistry, Indian Institute of Science, Bangalore 560012, Karnataka, India

\* Correspondence: subhasskarki@gmail.com (S.S.K.); vibha@ibab.ac.in (B.C.); Tel.: +91-080-233-256-11 (S.S.K.); +91-080-285-289-00 (B.C.); Fax: +91-080-234-253-73 (S.S.K.); +91-080-285-289-04 (B.C.)

† These authors contributed equally to this work.

Supplementary Figure S1: Evaluation of Molt4 cell viability after SP11 treatment as tested by LDH assay. Data from 3 different biological replicates were collected for all experiments and were presented as bar graphs using Graph Pad prism tool. Two-way ANOVA followed by Tukey's multiple comparison test was carried out and significance is represented as \*\*\*pvalue < 0.001, \*\*pvalue < 0.01, \*pvalue ≤ 0.05, ns = nonsignificant.

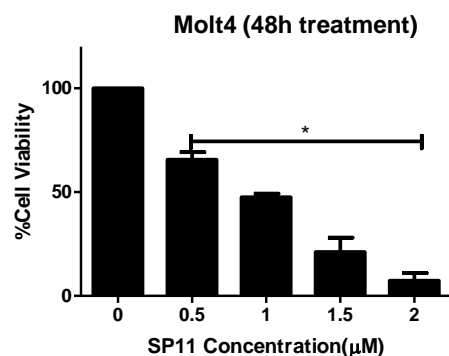

Supplementary Figure S2: In Cell western(ICW) images for Bcl2(A), Cleaved caspase-9(B) and Bax(C) in Molt4 cells after SP11 treatment. (D) Background control image of ICW.

**A**

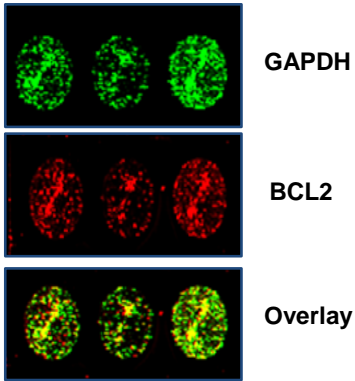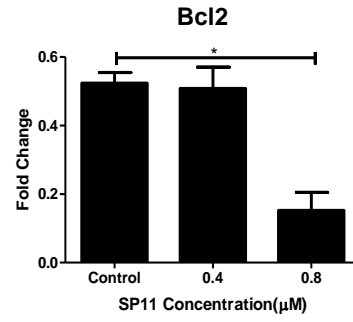

**B**

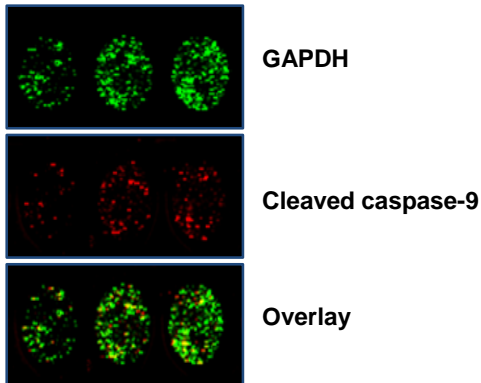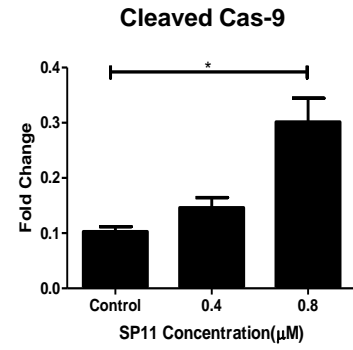

**C**

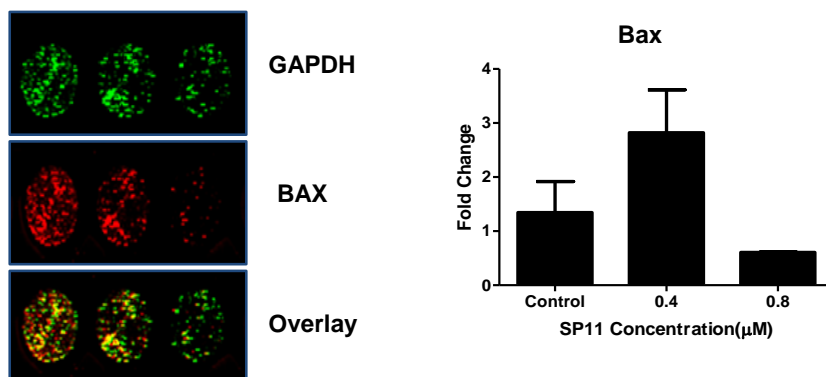

**D**

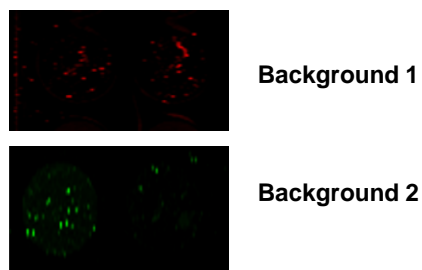

Supplementary Figure S3: (A) HSP90 CTD purification using Ni-NTA method. Wash 1,2 contains 50mM imidazole and wash 3,4 contains 100mM imidazole. Elution 1, elution 2 contains 400mM imidazole and elution 3 and 4 contains 1M imidazole.(B) HSP90 NTD purification using Ni-NTA method. Wash 1 contains 20mM imidazole and wash 2 contains 50mM imidazole. Elution 1 contains 200mM imidazole and elution 2 contains 500mM imidazole.

**A**

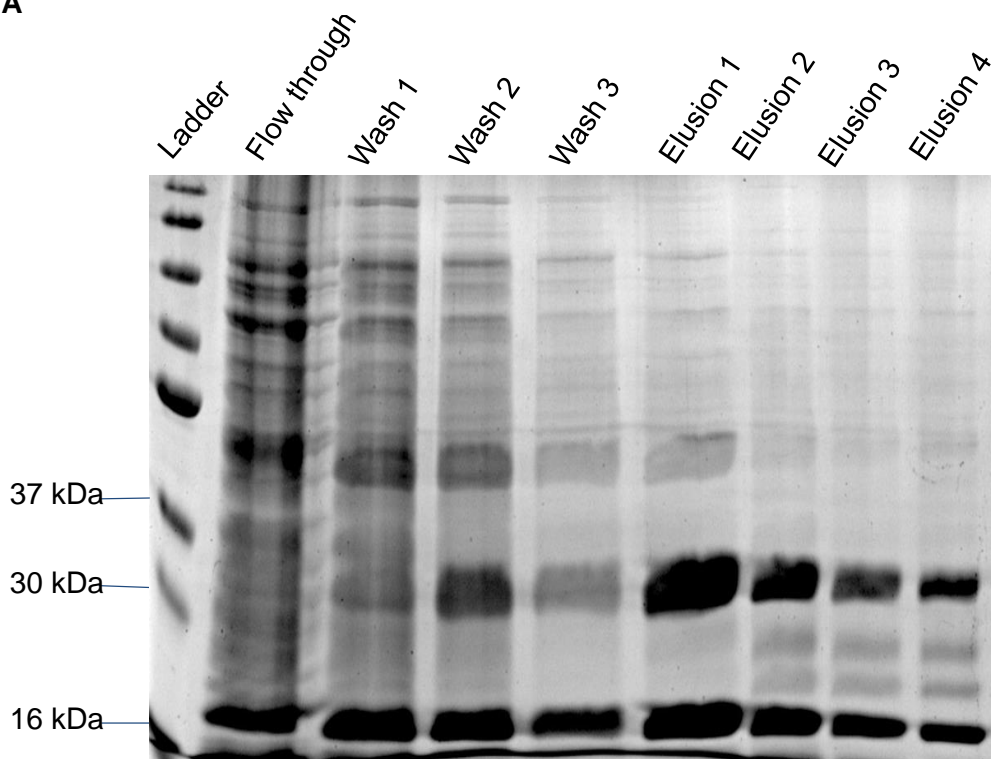

**B**

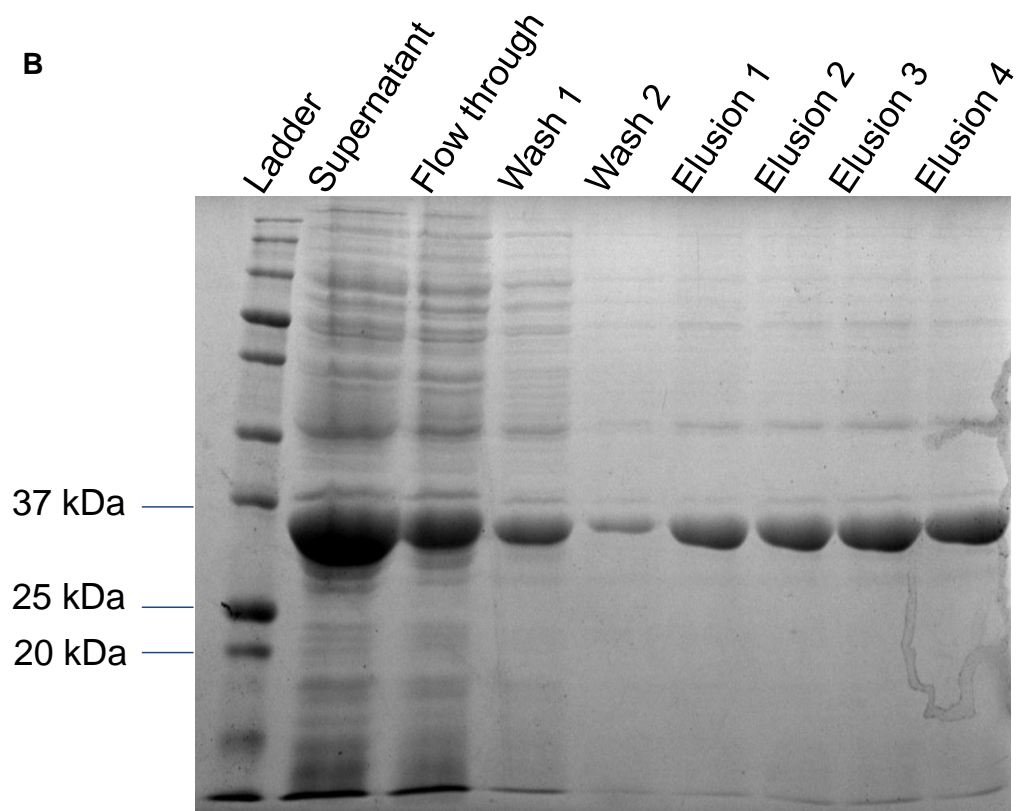

Supplementary Figure S4: Thermodynamic binding profile for protein domain- ligand interaction

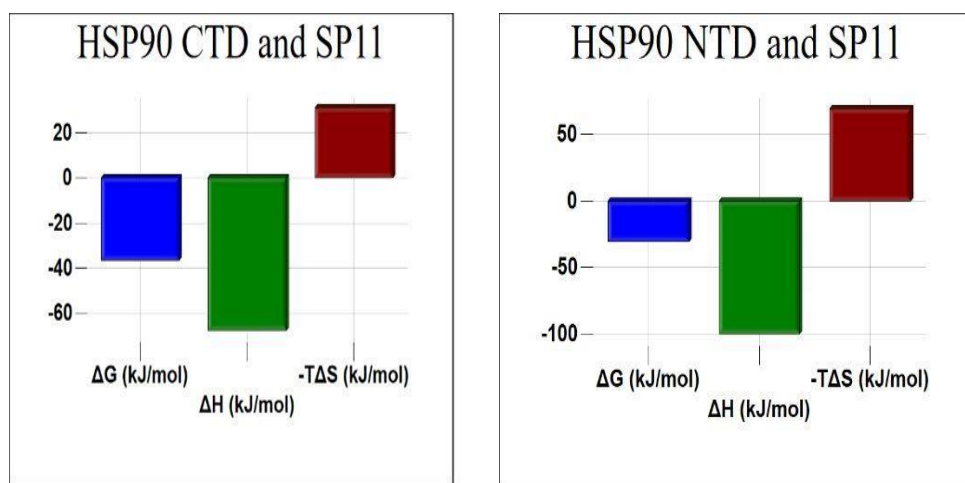

Supplement: s1 [file s1]
